# Supplementary material for: Targeting EMP3 suppresses proliferation and invasion of hepatocellular carcinoma cells through inactivation of PI3K/Akt pathway
Source: PubMed Central journal article supplement (PMC4741495; doi:10.18632/oncotarget.5414), 2015-10-12
Supplement: oncotarget-06-34859-s001.pdf [file oncotarget-06-34859-s001.pdf]

## SUPPLEMENTARY DATA AND FIGURES

### Construction of EMP3 plasmid

The constructions of the human EMP3 expression vectors was synthesis form Integrated DNA Technologies (Coralville, Iowa, USA), it were driven by the pIDTSMART vector. The pIDTSMART-EMP3 were isolated and cloned into the pGFP-N1 vector. pGFP-EMP3 plasmid was then constructed by digesting pIDTSMART-EMP3 with HindIII and BamHI isolating the 504 bp fragment,. The pGFP-EMP3 Sequence fidelity of EMP3 was confirmed using DNA sequence analysis.

### Transient transfection

For GFP or GFP-EMP3 plasmid transfections, cells were seeded at ~80% confluency and thereafter transfected for 6 h by replacing the previously described culture medium with serum-free DMEM containing 5  $\mu$ l Lipofectamine 2000 and 3  $\mu$ g plasmid DNA. Cells were transfected with plasmids encoding full-length EMP3. At the end of the transfection, the Lipofectamine 2000-containing serum-free DMEM was removed and replaced with normal growth medium. The cultures were then incubated for 48 h.

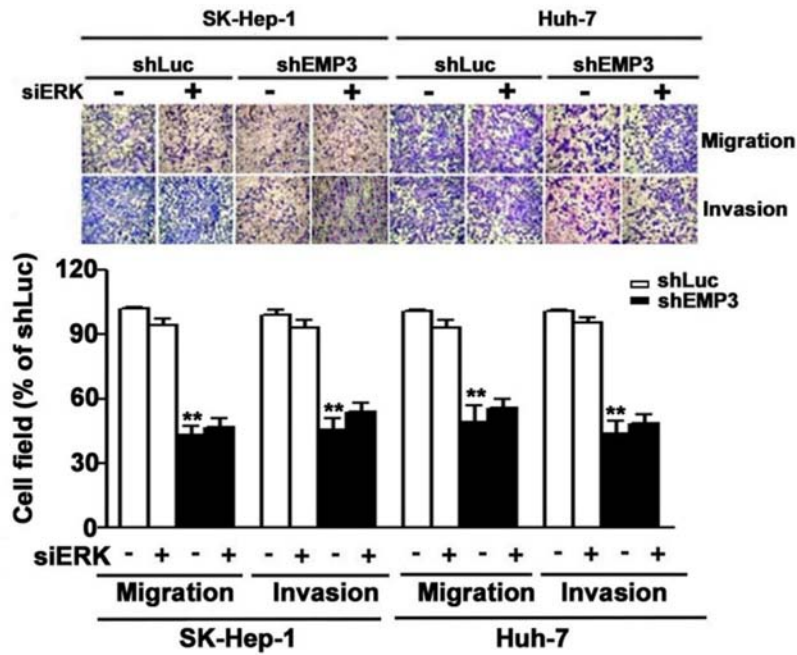

**Supplementary Figure S1: Knockdown of ERK does not affect the EMP3 knockdown-reduced migration and invasion in HCC cells.** Cells were silenced by the siRNAs against mock (neo-) or ERK (siERK+). The migratory and invasive abilities were examined. The upper plots were the representative results of the *in vitro* cell migration and invasion assay. The relative abilities of migration and invasion were shown in the lower plots. Data are presented as the mean  $\pm$  SE of at least three independent experiments. \*\*,  $p < 0.01$  comparing to that of shLuc cells.

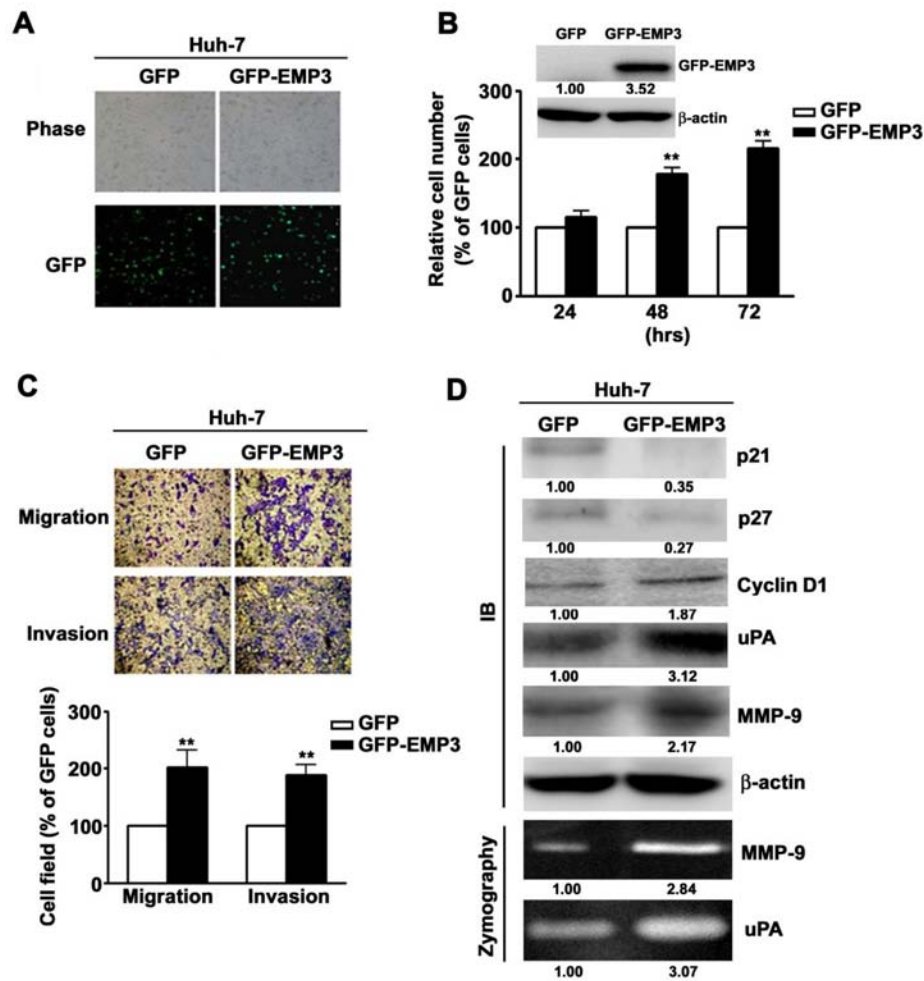

**Supplementary Figure S2: Overexpression of EMP3 facilitates aggressiveness of HCC cells.** Huh-7 cells were transfected with GFP-plasmid without (GFP) or with EMP3 (GFP-EMP3). **A.** Cell morphology and GFP fluorescence were observed under a microscopy. **B.** The expression of EMP3 was examined by immunoblotting (upper insert). Cell growth was determined by MTT assay. The relative cell number was normalized to that from GFP-transfected cells at 24 h (lower plot). **C.** The representative results of the *in vitro* migration and invasion assay (upper plot). The relative abilities of migration and invasion of GFP-EMP3 transfected cells was compared to that of GFP-transfected cells (lower plot). **D.** The expressions of indicated proteins were determined by immunoblotting (upper plot), and the proteolytic activities of MMP-9 and uPA were examined by zymography (lower plot). Data were presented as the mean  $\pm$  SE of at least three independent experiments. \*\*, represented  $p < 0.01$  comparing to that of GFP-transfected cells.
